# Supplementary material for: Activity-induced polar patterns of filaments gliding on a sphere
Source: PubMed Central journal article supplement (PMC9095588; doi:10.1038/s41467-022-30128-7), 2022-05-11
Supplement: 41467_2022_30128_MOESM1_ESM.pdf [file 41467_2022_30128_MOESM1_ESM.pdf]

**Supplementary Information for  
Activity-induced polar patterns of filaments gliding on a sphere**

Chiao-Peng Hsu,<sup>1,\*</sup> Alfredo Sciortino,<sup>1,\*</sup> Yu Alice de la Trobe,<sup>1</sup> and Andreas R. Bausch<sup>1,†</sup>

<sup>1</sup>*Center for Protein Assemblies and Lehrstuhl für Zellbiophysik (E27),  
Physics Department, Technische Universität München, Garching, Germany*

### Purification of gelsolin

Gelsolin was purified from adult bovine serum (Sigma Aldrich). The freshly defrosted serum was supplied with 50 mM Tris-HCl (pH 8.0) and 0.2 mM phenylmethylsulfonyl fluoride. Then, the serum proteins were precipitated with 35% and 50% saturated ammonium sulfate and subsequently spun down by centrifugation. The pellet obtained by the second precipitation was washed twice with a buffer containing 25 mM Tris-HCl (pH 8.0) and 50% saturated ammonium sulfate and then dissolved and subsequently dialyzed against a buffer containing 25 mM Tris-HCl (pH 8.0), 45 mM NaCl, and 1 mM EGTA. Gelsolin was purified by ion-exchange chromatography on a diethylaminoethyl cellulose column by washing first with the same buffer, then with a buffer containing 30 mM NaCl, and finally eluted with a buffer containing 25 mM Tris-HCl (pH 8.0), 30 mM NaCl, and 2 mM  $\text{CaCl}_2$ .

### Preparation of biotinylated HMM

Biotin-NHS (Sigma Aldrich) was dissolved in dimethyl sulfoxide (Sigma Aldrich) at 2.5 mg/mL. Biotinylated HMM was obtained by incubating HMM with Biotin-NHS in a 1:10 molar ratio at room temperature for 10 min. The reaction was quenched by adding monosodium glutamate (Sigma Aldrich) in a 4:1 mass ratio (monosodium glutamate to HMM) into the mixture. The biotinylated HMM was then subsequently dialyzed against a buffer containing 5 mM  $\text{NaH}_2\text{PO}_4$  (pH 6.5), 40 mM NaCl, 2 mM DTT, and 0.8 mM  $\text{NaN}_3$ .

### F-actin length analysis

The gelsolin-mediated fluorescent actin filaments were imaged using total internal reflection microscopy (TIRF; DMi8 S module Infinity TIRF, Leica) with an HC PL APO 100x/1.47 CORR TIRF oil immersion objective. The filaments were imaged in a glass chamber that consisted of cover-slips (Carl Roth) fixed to microscope slides (Carl Roth) by 4-layer parafilm. The cover-slips were coated with a 0.1% nitrocellulose solution, which was made by diluting a 2% solution (Electron Microscopy Sciences) in amyl acetate (Roth), and were left to dry overnight. HMM was diluted in assay buffer (pH 7.4) containing 25 mM Imidazole, 4 mM  $\text{MgCl}_2$ , 25 mM KCl, and 1 mM EGTA. The glass chamber was briefly incubated with the HMM dilution and the surfaces were then passivated with a BSA solution (10 mg/mL dissolved in assay buffer), before the addition of fluorescent-labeled F-actin diluted in assay buffer. The ATP-free conditions allow filaments to bind to HMM in the rigor state. The filaments' length was determined using Ridge Defection in Fiji/ImageJ which exhibiting a log-normal distribution and having the mode length  $L = 0.55 \mu\text{m}$  (Supplementary Figure 1).

### Calculation of F-actin surface density and surface packing fraction

The surface density of F-actin on the inner leaflet of the vesicle was calculated based on the assumption that all the encapsulated F-actin were bound to the membrane. The surface density  $\rho$  was obtained by dividing the number of F-actin,  $N_{F-actin}$ , inside the vesicle by the surface area of the vesicle such that

$$\rho = \frac{N_{F-actin}}{4\pi R^2} = \frac{\frac{4}{3}\pi R^3 \cdot c_A \cdot N_0 \cdot \frac{L_{G-actin}}{L}}{4\pi R^2} = \frac{R \cdot c_A \cdot N_0 \cdot L_{G-actin}}{3 \cdot L}, \quad (1)$$

where  $R$  is the vesicle radius,  $c_A$  is the encapsulated actin concentration,  $N_0$  is the Avogadro number,  $L_{G-actin}$  is the length of each G-actin occupied in an F-actin, and  $L$  is the F-actin length. By applying  $R = 18 \mu\text{m}$  (Supplementary Figure 3),  $L_{G-actin} = 2.73 \text{ nm}$  [1], and  $L = 0.55 \mu\text{m}$ , we obtained  $\rho \approx 1.8, 2.7, 5.3,$  and  $10.7$  filaments/ $\mu\text{m}^2$  for  $c_A = 100, 150, 300,$  and  $600 \text{ nM}$ , respectively.

The surface packing fraction  $\phi$  was calculated that  $\phi = N_{F-actin} L w / 4\pi R^2 = \rho L w$ , where  $w = 7 \text{ nm}$  is the width of F-actin. We obtained  $\phi = 0.007, 0.01, 0.02,$  and  $0.04$  for  $c_A = 100, 150, 300,$  and  $600 \text{ nM}$ , respectively.

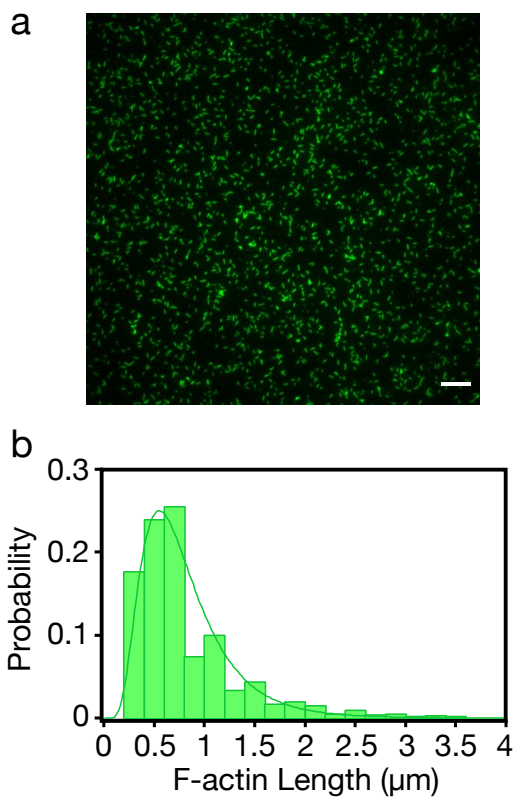

Supplementary Figure 1. **Gelsolin-mediated fluorescent actin filaments.** a, TIRF image of the gelsolin-mediated fluorescent actin filaments. Scale bar, 5  $\mu\text{m}$ . b, Distribution of the F-actin length,  $N = 3745$ .

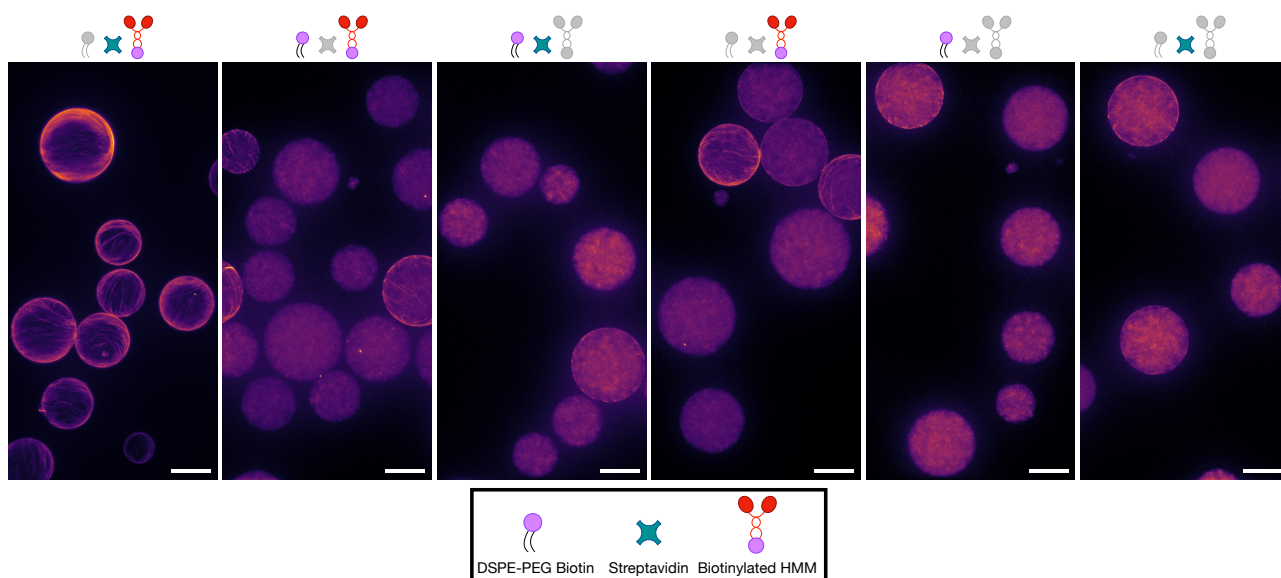

Supplementary Figure 2. **Influence of streptavidin-biotin-interaction components.** Fluorescence images (z-projections) of vesicles with encapsulated actin concentration = 600 nM, but without one or two of the streptavidin-biotin-interaction components after 60 min of production. In all cases, no collective pattern is observed. Scale bars, 20  $\mu\text{m}$ .

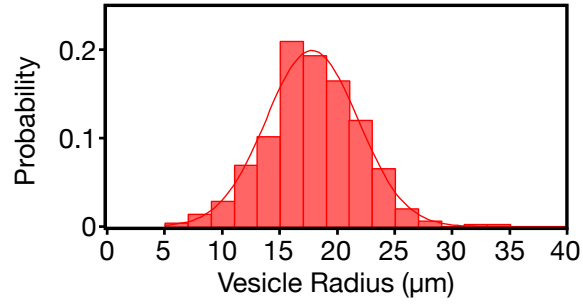

Supplementary Figure 3. **Active actin vesicle size.** Distribution of the radius of active actin vesicles,  $N = 492$

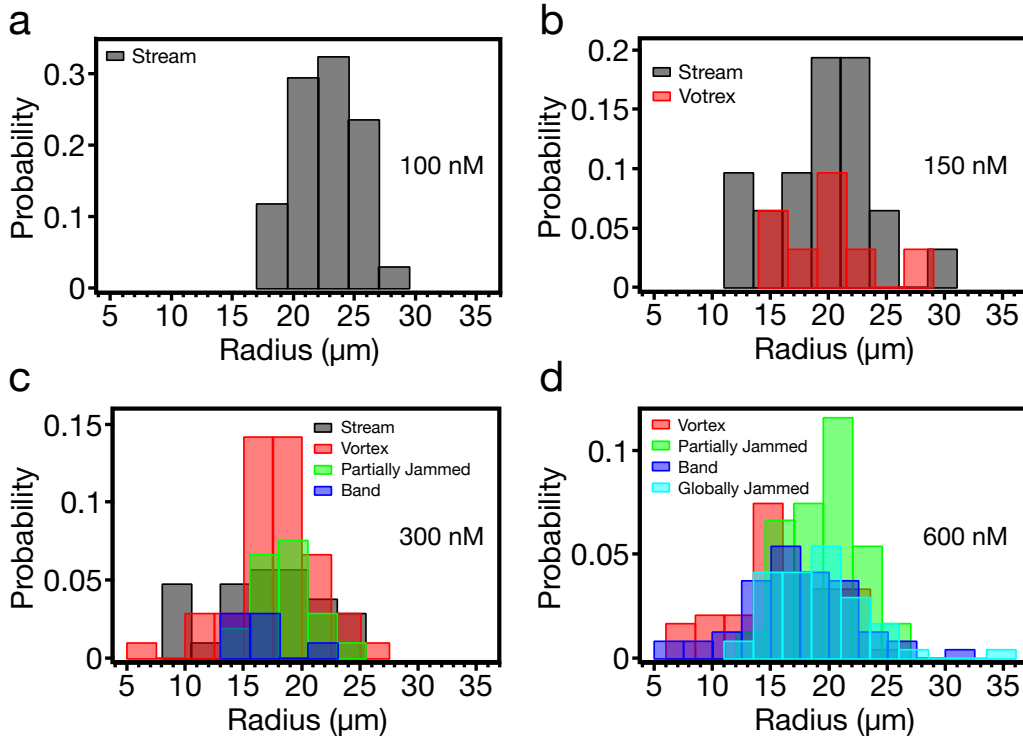

Supplementary Figure 4. **Vesicle size vs. polar patterns.** **a–d**, The radii of vesicles at 100 nM (**a**), 150 nM (**b**), 300 nM (**c**), and 600 nM (**d**) for each observed polar pattern. The bin width is  $2.5 \mu\text{m}$ .

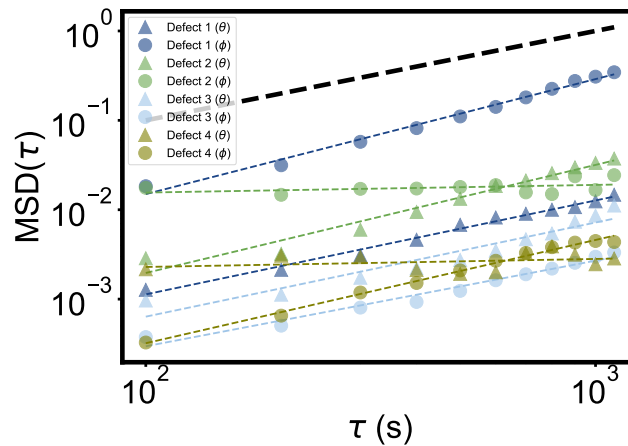

Supplementary Figure 5. **Mean-square displacement (MSD) of globally-jammed patterns.** MSD of the four  $+1/2$  defects in a globally-jammed vesicle. Dashed line indicates diffusive behavior ( $\text{MSD} \propto \tau$ ).

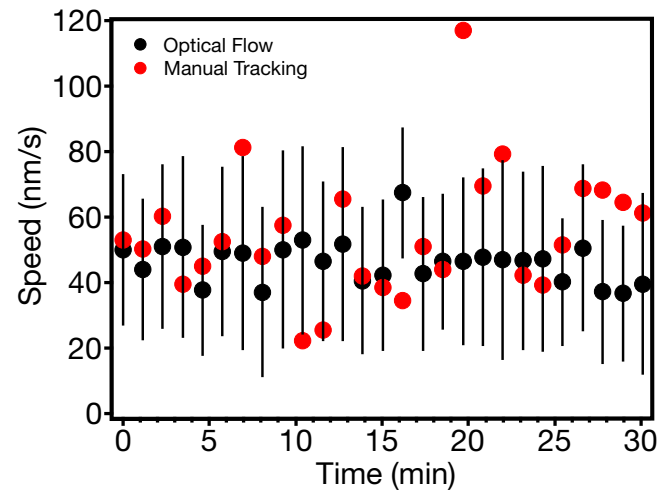

Supplementary Figure 6. **Manuel tracking and optical flow.** The instantaneous speed of a stream obtained by manual tracking (red) is consistent with the one obtained by optical flow method (black). Error bars represent the standard deviations of the velocity extracted from optical flow.

---

\* These authors contributed equally

† abausch@mytum.de

- [1] Egelman, E. H., Francis, N. & DeRosier, D. J. F-actin is a helix with a random variable twist. *Nature* **298**, 131–135 (1982).
